# Supplementary material for: Synthesis of closed PbS nanowires with regular geometric morphologiesElectronic supplementary information (ESI) available: XRD pattern of the PbS CNWs, FTIR spectrum of the polymer, TEM images of more PbS CNWs. See http://www.rsc.org/suppdata/jm/b1/b111187f/
Source: Royal Society of Chemistry journal article supplement (doi:10.1039/b111187f), 2002-02-01
Supplement: b111187f.doc [file b111187f.doc]

**Supporting Information Available:** 1. XRD pattern of the PbS CNWs, **2.** FTIR spectrum of the polymer, **3.** TEM images of more PbS CNWs

#### Manuscript No. B111187F

**1.** XRD pattern of the PbS CNWs.


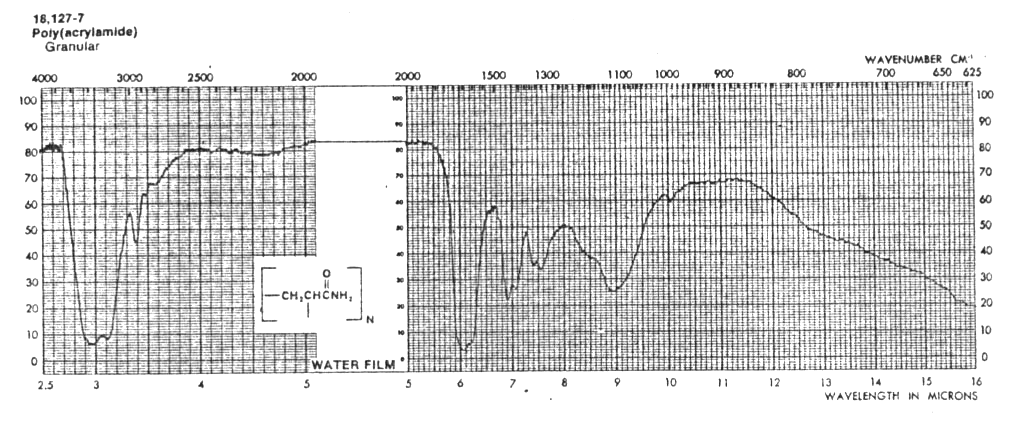
 **(a)**

**(b)**

**2. FTIR spectra: (a)** the standard spectrum of polyacrylamide obtained from *The Aldrich Library of Infrared Spectra*, Edition Ⅲ, No. 18127-2, **(b)** the spectrum of poly[N-(2-Aminoethyl)acrylamide], its sample was obtained from the solvent after the synthetic process was carried out by fully separating the PbS CNWs and evaporating the small molecules (ethylenediamine, H2O). Compared to (a), a characteristic peak of -CO-**NH**-R at 1566 cm-1 appeared in (b) resulting from the combination of the bending vibration of **NH** and the stretching vibration of **C-N**,* which was apparently different from that of –CO-**NH2** [at ~1620 cm-1, δ(**NH2**)].** The wide peak at 3366-3261 cm-1 resulted from the stretching vibration of **NH** existing in the structure –CO-**NH**-CH2-CH2-**NH2**. The deformation vibration of the **NH2** in -CH2-CH2-**NH2** was located at 1615 cm-1, which could not separated from that of the stretching vibration of C=O (1641.8 cm-1).

*L.C. Afremow, K. E. Isakson, D. A. Netzel, D. J. Tessari, J. T. Vandeberg, Infrared Spectroscopy Its Use in the Coating Inductry, Federation of Societies for Paint Technology, Philadelphia, 1969.

**N. B. Colthup, L. H. Daly, S. E. Wiberley, Introduction to Infrared and Raman Spectroscopy, Academic Press, New York, 1975.


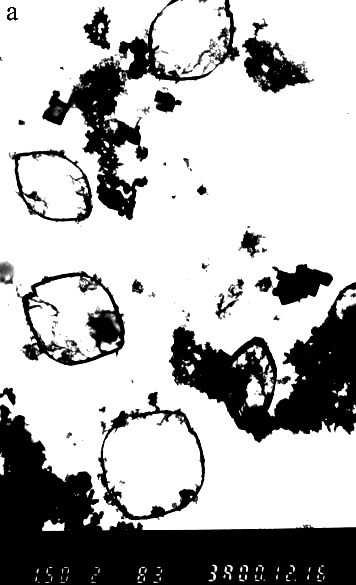

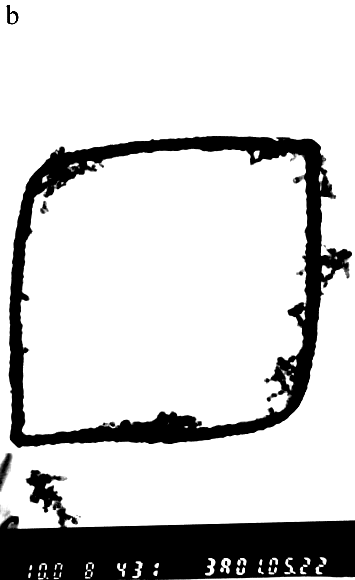

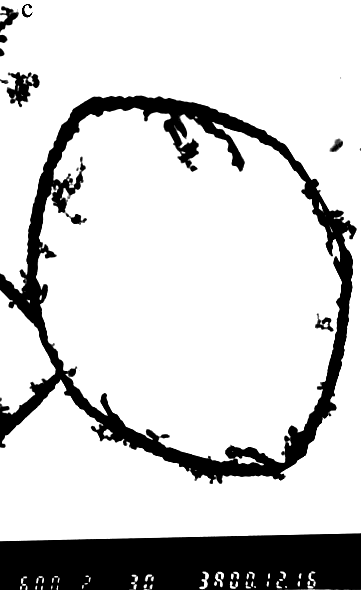

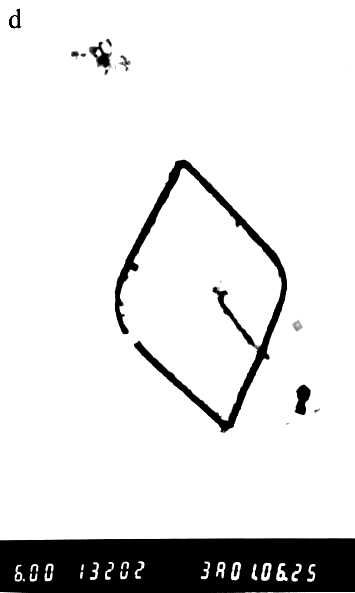

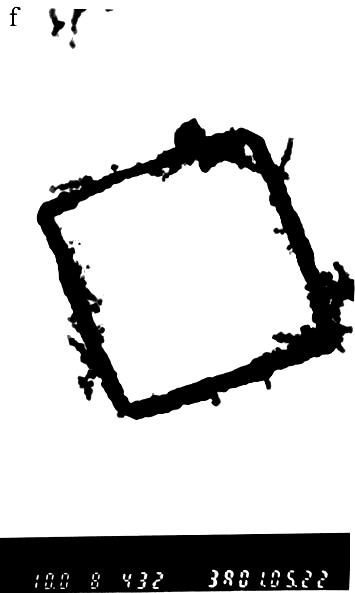

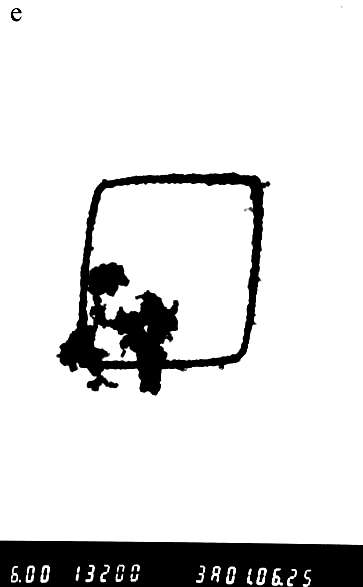


**3.** TEM images of more PbS CNWs.

***Notes*** The first number (X) in the photos ×103 shows the amplifications of the samples in this paper.
